# Supplementary material
Source: PubMed Central journal article supplement (PMC7394201)
Supplement: NIHMS1597243-supplement-mmc1.pdf [file NIHMS1597243-supplement-mmc1.pdf]

**Cell, Volume 181**

**Supplemental Information**

**Interpersonal Gut Microbiome Variation Drives**

**Susceptibility and Resistance to Cholera Infection**

**Salma Alavi, Jonathan D. Mitchell, Jennifer Y. Cho, Rui Liu, John C. Macbeth, and Ansel Hsiao**

## Supplemental References

Amin Marashi, S.M., Rajabnia, R., Imani Fooladi, A.A., Hojati, Z., Moghim, S., Nasr Esfahani, B., 2013. Determination of ctxAB expression in *Vibrio cholerae* Classical and El Tor strains using Real-Time PCR. *Int. J. Mol. Cell. Med.* 2, 9–13.

Fykse, E.M., Skogan, G., Davies, W., Olsen, J.S., Blatny, J.M., 2007. Detection of *Vibrio cholerae* by real-time nucleic acid sequence-based amplification. *Appl. Environ. Microbiol.* 73, 1457–1466.
