# Supplementary material
Source: PubMed Central journal article supplement (PMC7394201)
Supplement: NIHMS1597243-supplement-mmc2.pdf [file NIHMS1597243-supplement-mmc2.pdf]

**Supplementary Table 1. Commensal strains, Related to Figure STAR Methods.**

| <b>Bacterium</b>                                           | <b>Community</b> | <b>Phylum</b>  |
|------------------------------------------------------------|------------------|----------------|
| <i>Bacteroides caccae</i>                                  | CR               | Bacteroidetes  |
| <i>Bacteroides thetaiotaomicron</i>                        | CR               | Bacteroidetes  |
| <i>Bacteroides uniformis</i>                               | CR               | Bacteroidetes  |
| <i>Bifidobacterium longum</i> subsp. <i>longum</i>         | CR               | Actinobacteria |
| <i>Blautia torques</i>                                     | CR               | Firmicutes     |
| <i>Collinsella aerofaciens</i>                             | CR               | Actinobacteria |
| <i>Dorea formicigenerans</i>                               | CR               | Firmicutes     |
| <i>Dorea longicatena</i>                                   | CR               | Firmicutes     |
| <i>Eubacterium rectale</i>                                 | CR               | Firmicutes     |
| <i>Faecalibacterium prausnitzii</i>                        | CR               | Firmicutes     |
| <i>Bacteroides vulgatus</i>                                | CR, SR           | Bacteroidetes  |
| <i>Blautia obeum</i>                                       | CR, SR           | Firmicutes     |
| <i>Clostridium scindens</i>                                | CR, SR           | Firmicutes     |
| <i>Enterococcus faecalis</i>                               | DS               | Firmicutes     |
| <i>Escherichia coli</i>                                    | DS               | Proteobacteria |
| <i>Streptococcus infantarius</i> subsp. <i>infantarius</i> | DS               | Firmicutes     |
| <i>Streptococcus salivarius</i> subsp. <i>salivarius</i>   | DS               | Firmicutes     |
| <i>Streptococcus salivarius</i> subsp. <i>thermophilus</i> | DS               | Firmicutes     |

| <b>Strain Name</b> | <b>NCBI<br/>Taxonomy ID</b> |
|--------------------|-----------------------------|
| ATCC 43185         | 411901                      |
| VPI-5482           | 226186                      |
| ATCC 8492          | 411479                      |
| DSM 20219          | 565042                      |
| ATCC 27756         | 411460                      |
| ATCC 25986         | 411903                      |
| ATCC 27755         | 411461                      |
| DSM 13814          | 411462                      |
| ATCC 33656         | 515619                      |
| DSM 17677          | 411483                      |
| ATCC 8482          | 435590                      |
| ATCC 29174         | 411459                      |
| ATCC 35704         | 411468                      |
| OG1RF              | 474186                      |
| DH5 $\alpha$       | 668369                      |
| ATCC BAA-102       | 471872                      |
| ATCC 13419         | 1304                        |
| DSM 20617          | 1091038                     |
