# Supplementary material
Source: PubMed Central journal article supplement (PMC7394201)
Supplement: NIHMS1597243-supplement-mmc5.pdf [file NIHMS1597243-supplement-mmc5.pdf]

**Supplementary Table 4. Recovery of microbial diversity from complex human fecal microbiomes by culturing and mouse colonization. Related to Figures 4 and 7.**

**(A) Species-level recovery**

| Human subject | Species detected (whole sample) | % Detected after:   |                   |                            |
|---------------|---------------------------------|---------------------|-------------------|----------------------------|
|               |                                 | Anaerobic Culturing | Aerobic Culturing | Colonized in suckling mice |
| A             | 47                              | 40.00%              | 6%                | 63%                        |
| B             | 55                              | 29%                 | 2%                | 55%                        |
| C             | 47                              | 38%                 | 15%               | 78%                        |
| D             | 39                              | 51%                 | 7%                | 64%                        |
| E             | 39                              | 46%                 | 7%                | 74%                        |
| F             | 55                              | 38.00%              | 14.00%            | 54%                        |
|               |                                 |                     |                   |                            |

**(B) Genus-level recovery**

| Human subject | Genera detected (whole sample) | % Detected after:   |                   |                            |
|---------------|--------------------------------|---------------------|-------------------|----------------------------|
|               |                                | Anaerobic Culturing | Aerobic Culturing | Colonized in suckling mice |
| A             | 25                             | 52.00%              | 12%               | 92%                        |
| B             | 29                             | 38%                 | 3%                | 79%                        |
| C             | 28                             | 43%                 | 25%               | 78%                        |
| D             | 24                             | 58%                 | 13%               | 75%                        |
| E             | 17                             | 76%                 | 18%               | 82%                        |
| F             | 31                             | 48.00%              | 25.00%            | 65%                        |

**(C) Total species-level relative abundance of complete fecal specimen represented by strains recovered after *in vitro* culturing.**

| Human subject | Total relative abundance (species level) of complex sample recovered |                   |
|---------------|----------------------------------------------------------------------|-------------------|
|               | Anaerobic Culturing                                                  | Aerobic Culturing |
| A             | 99%                                                                  | 0%                |
| B             | 85%                                                                  | 0%                |
| C             | 91%                                                                  | 1%                |
| D             | 94%                                                                  | 38%               |
| E             | 66%                                                                  | 0%                |
| F             | 88%                                                                  | 97%               |

**(D) Genus-level relative abundance in complex human fecal microbiomes represented by model community members.**

| <b>Human Subject</b> | <b>% Complex sample genus-level abundance represented by CR model community</b> | <b>% Genus-level abundance of fecal sample colonized in suckling mice represented by CR model community</b> | <b>% Complex sample genus-level abundance represented by DS model community</b> | <b>% Genus-level abundance of fecal sample colonized in suckling mice represented by DS model community</b> |
|----------------------|---------------------------------------------------------------------------------|-------------------------------------------------------------------------------------------------------------|---------------------------------------------------------------------------------|-------------------------------------------------------------------------------------------------------------|
| <b>A</b>             | 62%                                                                             | 47.00%                                                                                                      | 0.10%                                                                           | 0.30%                                                                                                       |
| <b>B</b>             | 37.00%                                                                          | 10.00%                                                                                                      | 0.20%                                                                           | 1.00%                                                                                                       |
| <b>C</b>             | 55.00%                                                                          | 44.00%                                                                                                      | 0.30%                                                                           | 1.00%                                                                                                       |
| <b>D</b>             | 54.00%                                                                          | 30.00%                                                                                                      | 1.00%                                                                           | 5.00%                                                                                                       |
| <b>E</b>             | 60.00%                                                                          | 34.00%                                                                                                      | 0.00%                                                                           | 2.00%                                                                                                       |
| <b>F</b>             | 73.00%                                                                          | 42.00%                                                                                                      | 0.05%                                                                           | 0.09%                                                                                                       |
