# Supplementary material
Source: PubMed Central journal article supplement (PMC7394201)
Supplement: NIHMS1597243-supplement-mmc6.pdf [file NIHMS1597243-supplement-mmc6.pdf]

**Supplementary Table 5. Bile salt hydrolases found in genomes of defined community members. Related to Figure 6.**

%ID calculated from amino-acid level alignments by blastp

| % deconjugation of TCA: [cholic acid] after treatment / [taurocholic acid] input * 100 (Song et al 2019) |                   |                   | 39.89%                                              | 101.75% | 0.73%  | 102.05% | 95.71% | 38.16% | 2.89%  | 39.85% |
|----------------------------------------------------------------------------------------------------------|-------------------|-------------------|-----------------------------------------------------|---------|--------|---------|--------|--------|--------|--------|
|                                                                                                          |                   |                   | Percent amino acid identity by <i>bsh</i> phylotype |         |        |         |        |        |        |        |
| Species                                                                                                  | Defined Community | Locus             | BSH-T0                                              | BSH-T1  | BSH-T2 | BSH-T3  | BSH-T4 | BSH-T5 | BSH-T6 | BSH-T7 |
| <i>Bacteroides caccae</i>                                                                                | CR                | BACCAC_03140      | 26.47                                               | 24.85   | 20.75  | 22.04   | 22.05  | 28.4   | 83.81  | 23.57  |
| <i>Bacteroides thetaiotamicron</i>                                                                       | CR                | BT_2086           | 25.49                                               | 24.54   | 20.44  | 22.36   | 22.04  | 28.82  | 83.86  | 26.97  |
|                                                                                                          |                   | BT_1259           | 24.17                                               | 19.59   | 23.44  | 22.18   | 23.17  | 26.4   | 53.89  | 29.59  |
| <i>Bacteroides uniformis</i>                                                                             | CR                | BACUNI_02933      | 28.44                                               | 27.49   | 30.03  | 27.19   | 29.6   | 100    | 30.14  | 29.21  |
|                                                                                                          |                   | BACUNI_00572      | 26.94                                               | 25      | 22.61  | 22.44   | 22.08  | 30.14  | 100    | 30.09  |
| <i>Bacteroides vulgatus</i>                                                                              | CR,SR             | BVU_2699          | 27.81                                               | 29.31   | 29.13  | 25.74   | 30.62  | 58.15  | 30.26  | 50     |
|                                                                                                          |                   | BVU_3993          | 26.56                                               | 24.62   | 21.77  | 23.47   | 22.77  | 28.53  | 86.26  | 32.95  |
|                                                                                                          |                   | BVU_1032          | 22.22                                               | 45.45   | 58.33  | 33.33   | 29.41  | 54.55  | 50     | 20.65  |
| <i>Bifidobacterium longum</i> subsp. <i>longum</i>                                                       | CR                | BLLJ_0817         | 27.68                                               | 41.38   | 36.91  | 35.44   | 100    | 29.6   | 22.44  | 36     |
| <i>Blautia obeum</i>                                                                                     | CR,SR             | RUMOBE_00028      | 26.78                                               | 76.31   | 59.69  | 47.38   | 39.18  | 28.08  | 23.05  | 24.18  |
|                                                                                                          |                   | RUMOBE_03454      | 27.08                                               | 75.62   | 58.46  | 50.46   | 40.13  | 30.38  | 25.08  | 23.57  |
| <i>Blautia torques</i>                                                                                   | CR                | ERS852577_00637   | 28.76                                               | 72.24   | 56.85  | 46.73   | 40.31  | 28.22  | 22.92  | 26.61  |
|                                                                                                          |                   | ERS852530_03853   | 27.67                                               | 69.14   | 57.23  | 49.86   | 38.99  | 32.07  | 24.44  | 27.04  |
|                                                                                                          |                   | ERS852577_05096   | 27.08                                               | 75.31   | 58.46  | 50.77   | 39.38  | 30.7   | 25.08  | 23.57  |
| <i>Collinsella aerofaciens</i>                                                                           | CR                | COLAER_00574      | 27.37                                               | 36.55   | 33.77  | 34.67   | 50.99  | 28.23  | 20.07  | 42.86  |
|                                                                                                          |                   | CSV91_00430       | 27.52                                               | 35.97   | 33.86  | 35.03   | 50.95  | 28.63  | 20.7   | 22.06  |
|                                                                                                          |                   | CSV91_05910       | 32.56                                               | 25      | 24     | 47.06   | 25.29  | 38.45  | 29.17  | 23.44  |
| <i>Dorea longicatena</i>                                                                                 | CR                | DORLON_01571      | 27.08                                               | 75.62   | 58.46  | 50.46   | 40.13  | 30.38  | 25.08  | 23.57  |
| <i>Eubacterium rectale</i>                                                                               | CR                | EUBREC_2835       | 28.76                                               | 72.24   | 56.85  | 46.73   | 40     | 22.82  | 22.92  | 26.61  |
| <i>Faecalibacterium prausnitzii</i>                                                                      | CR                | FAEPRAA2165_00537 | 25.7                                                | 69.52   | 57.91  | 48.57   | 41.5   | 31.82  | 22.01  | 31.58  |
| <i>Enterococcus faecalis</i>                                                                             | DS                | OG1RF_12285       | 98.87                                               | 26.01   | 26.67  | 26.28   | 27.68  | 27.52  | 26.26  | 26.67  |
| <i>Streptococcus infantarius</i>                                                                         | DS                | STRINF_01499      | 25.98                                               | 57.06   | 100    | 47.85   | 36.76  | 30.03  | 2.61   | 27.68  |
| <i>Vibrio cholerae</i>                                                                                   | N/A               | VCA0877           | 25.42                                               | 22.63   | 21.94  | 22.58   | 22.74  | 24.72  | 45.53  | 22.58  |

Root-Mean-Square Distance (RMSD) of spatial variation between predicted structure of RUMOBE\_00028 vs indicated phylotypes

|                      |       |              | <b>BSH-T0</b> | <b>BSH-T1</b> | <b>BSH-T2</b> | <b>BSH-T3</b> | <b>BSH-T4</b> | <b>BSH-T5</b> | <b>BSH-T6</b> | <b>BSH-T7</b> |
|----------------------|-------|--------------|---------------|---------------|---------------|---------------|---------------|---------------|---------------|---------------|
| <i>Blautia obeum</i> | CR,SR | RUMOBE_00028 | 4.051         | 0.000         | 0.299         | 0.294         | 2.171         | 3.941         | 4.862         | 12.396        |
