# Supplementary material
Source: PubMed Central journal article supplement (PMC7394201)
Supplement: NIHMS1597243-supplement-mmc7.pdf [file NIHMS1597243-supplement-mmc7.pdf]

**Supplementary Table 6. Oligonucleotides used in this study, Related to Figure STAR Methods.**

| Oligonucleotide                                                            | Source                                                                                                                                                          | Description                                                                                                   |
|----------------------------------------------------------------------------|-----------------------------------------------------------------------------------------------------------------------------------------------------------------|---------------------------------------------------------------------------------------------------------------|
| GTCGACGGTATCGATAATGCTTATGTGTACAGCTGC                                       | This paper                                                                                                                                                      | <i>RUMOBE_00028</i> forward cloning primer                                                                    |
| GCAGGAATTCGATATCACTAATTCTGAAAATGAATCTGC                                    | This paper                                                                                                                                                      | <i>RUMOBE_00028</i> reverse cloning primer                                                                    |
| CCAAAACAGCTTTCGCTACGTTGCTGGCTCGTTTTAACACGGAGT<br>AAGTGTTAGAAAAATTCATCCAGCA | This paper                                                                                                                                                      | Construction of <i>B. obeum luxS</i> insertion into the <i>endA</i> gene of the <i>E. coli</i> forward primer |
| GGTTGTACGCGTGGGGTAGGGGTTAACAAAAGAATCCCGCTA<br>GTGTAGGCGGGCAGTGAAAGGAAGGCC  | This paper                                                                                                                                                      | Construction of <i>B. obeum luxS</i> insertion into the <i>endA</i> gene of the <i>E. coli</i> reverse primer |
| GAACTTTCGTCACGTAAGTC                                                       | This paper                                                                                                                                                      | <i>vasK</i> deletion upstream fragment forward primer                                                         |
| GTCGACGGATCCCCGGAATCATGAATTGTGTCCTTGTTTAC                                  | This paper                                                                                                                                                      | <i>vasK</i> deletion upstream reverse primer                                                                  |
| GAACTTTCGTCACGTAAGTC                                                       | This paper                                                                                                                                                      | <i>vasK</i> deletion downstream fragment forward primer                                                       |
| GTCGACGGATCCCCGGAATCATGAATTGTGTCCTTGTTTAC                                  | This paper                                                                                                                                                      | <i>vasK</i> deletion downstream reverse primer                                                                |
| ATCCGGGGATCCGTCGAC                                                         | This paper                                                                                                                                                      | <i>vasK</i> trimethoprim resistance cassette replacement forward primer                                       |
| TGTAGGCTGGAGCTGCTTC                                                        | This paper                                                                                                                                                      | <i>vasK</i> trimethoprim resistance cassette replacement reverse primer                                       |
| CTCCTACGGGAGGCAGCAG                                                        | This paper                                                                                                                                                      | 16S forward qPCR primer                                                                                       |
| TTACCGCGG CTGCTGGCAC                                                       | This paper                                                                                                                                                      | 16S reverse qPCR primer                                                                                       |
| GCGATCAGATTACGATCACTC                                                      | This paper                                                                                                                                                      | <i>RUMOBE_00028</i> forward qPCR primer                                                                       |
| GCCATGCCAACACCTTTTTTC                                                      | This paper                                                                                                                                                      | <i>RUMOBE_00028</i> reverse qPCR primer                                                                       |
| GAAGAAGTTTGTAAGAAGAACACG                                                   | Fykse et al. 2007                                                                                                                                               | <i>tcpA</i> forward qPCR primer                                                                               |
| CGCTGAGACCACACCATA                                                         | This paper                                                                                                                                                      | <i>tcpA</i> reverse qPCR primer                                                                               |
| CACTAAGTGGGCACTTCTCA                                                       | This paper                                                                                                                                                      | <i>ctxA</i> forward qPCR primer                                                                               |
| TGATCATGCAAGAGGAACTCA                                                      | Fykse et al. 2007                                                                                                                                               | <i>ctxA</i> reverse qPCR primer                                                                               |
| ATTGAAGCGGAAATGGGCGATAG                                                    | Amin Marashi et al., 2013                                                                                                                                       | <i>recA</i> forward qPCR primer                                                                               |
| TACACATACAGTTGGATTGCTTGAGG                                                 | Amin Marashi et al., 2013                                                                                                                                       | <i>recA</i> reverse qPCR primer                                                                               |
| AATGATACGGCGACCACCGAGATCTACACTATGGTAATT<br>GTGTGCCAGCMGCCGCGGTAA           | Earth microbiome project<br>( <a href="https://earthmicrobiome.org/protocols-and-standards/16s/">https://earthmicrobiome.org/protocols-and-standards/16s/</a> ) | 16S V4 library forward primer                                                                                 |

| Oligonucleotide                                                          | Source                                                                                                                                                          | Description                                 |
|--------------------------------------------------------------------------|-----------------------------------------------------------------------------------------------------------------------------------------------------------------|---------------------------------------------|
| CAAGCAGAAGACGGCATAACGAGATNNNNNNNNNNNAGTCAG<br>TCAGCCGGACTACHVGGGTWTCTAAT | Earth microbiome project<br>( <a href="https://earthmicrobiome.org/protocols-and-standards/16s/">https://earthmicrobiome.org/protocols-and-standards/16s/</a> ) | 16S V4 library reverse primer               |
| TATGGTAATTGTGTGCCAGCMGCCGCGGTAA                                          | Earth microbiome project<br>( <a href="https://earthmicrobiome.org/protocols-and-standards/16s/">https://earthmicrobiome.org/protocols-and-standards/16s/</a> ) | 16S V4 library read1 sequencing primer      |
| AGTCAGTCAGCCGGACTACHVGGGTWTCTAAT                                         | Earth microbiome project<br>( <a href="https://earthmicrobiome.org/protocols-and-standards/16s/">https://earthmicrobiome.org/protocols-and-standards/16s/</a> ) | 16S V4 library read2 sequencing primer      |
| ATTAGAWACCCBDGTAGTCCGGCTGACTGACT                                         | Earth microbiome project<br>( <a href="https://earthmicrobiome.org/protocols-and-standards/16s/">https://earthmicrobiome.org/protocols-and-standards/16s/</a> ) | 16S V4 library index read sequencing primer |
